# Supplementary material
Source: publisher figshare collection journal article supplement (https://acs.figshare.com/ndownloader/files/4207135)
Supplement: Supplementary file 1 [file 4207135]

# Bioconjugation of Protein-Repellent Zwitterionic Polymer Brushes Grafted from Silicon Nitride

*Ai T. Nguyen,<sup>a</sup> Jacob Baggerman,<sup>b</sup> Jos Paulusse,<sup>a</sup> Han Zuilhof,<sup>a,\*</sup> and Cees J.M. van Rijn<sup>a,b,\*</sup>*

a) Laboratory of Organic Chemistry, Wageningen University, Dreijenplein 8, 6703 HB Wageningen,

The Netherlands b) Aquamarijn Micro Filtration B.V., Berkelkade 11, 7201JE Zutphen, The

Netherlands

Corresponding authors: Han Zuilhof, E-mail: [Han.Zuilhof@wur.nl](mailto:Han.Zuilhof@wur.nl); Phone: +31 – 317 – 482– 361; Fax: +31 – 317 – 484914; Cees van Rijn, E-mail: [Cees.vanRijn@wur.nl](mailto:Cees.vanRijn@wur.nl), Phone: +31 – 317 – 482 – 370, Fax: +31 – 84 – 882 3204

## CONTENTS

1. Narrow-scan XPS spectrum of S<sub>2p</sub> region of polySBMA surface
2. Relationship between polySBMA thickness and the intensity of retained bromides
3. Fibrinogen adsorption of polySBMA-grafted on Si<sub>x</sub>N<sub>4</sub> surfaces with different thicknesses
4. Narrow-scan XPS spectrum of Br<sub>3d</sub> region of NH<sub>2</sub>-polySBMA surface
5. Top-view and cross-section AFM images of the polySBMA films after 2 consecutive reactions
6. Top-view and cross-section AFM images of the modified films before and after antibody attachment
7. Narrow-scan XPS spectrum of C<sub>1s</sub> region of antibody-polySBMA surface

1. Narrow-scan XPS spectrum of  $S_{2p}$  region of polySBMA surface

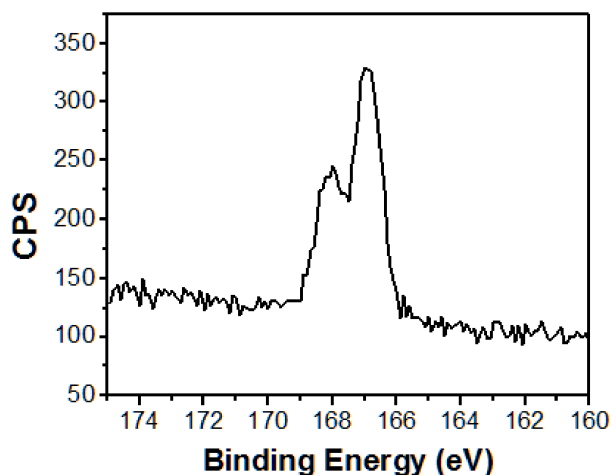

**Figure S1.** Narrow-scan XPS spectrum of  $S_{2p}$  region of polySBMA surface

2. Relationship between polySBMA thickness and the intensity of retained bromides obtained by wide-scan XPS spectra.

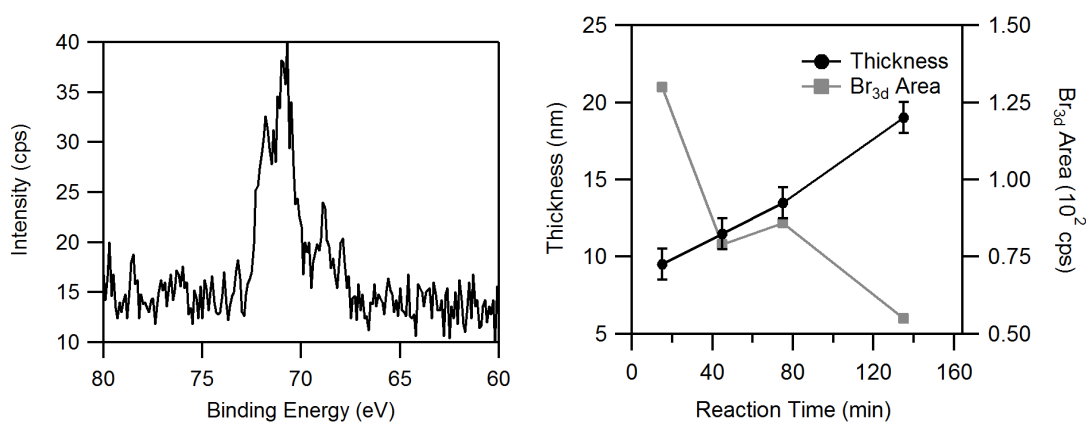

**Figure S2.** Narrow-scan XPS spectrum of  $Br_{3d}$  region (left) of a polySBMA-coated  $Si_xN_4$  surface and polySBMA film thickness and  $Br_{3d}$  signal intensity as function of polymerization time (right)

3. Fibrinogen adsorption on polySBMA surfaces with different thicknesses in comparison with hydrophobic C<sub>16</sub>-coated surfaces was measured by reflectometry.<sup>1</sup>

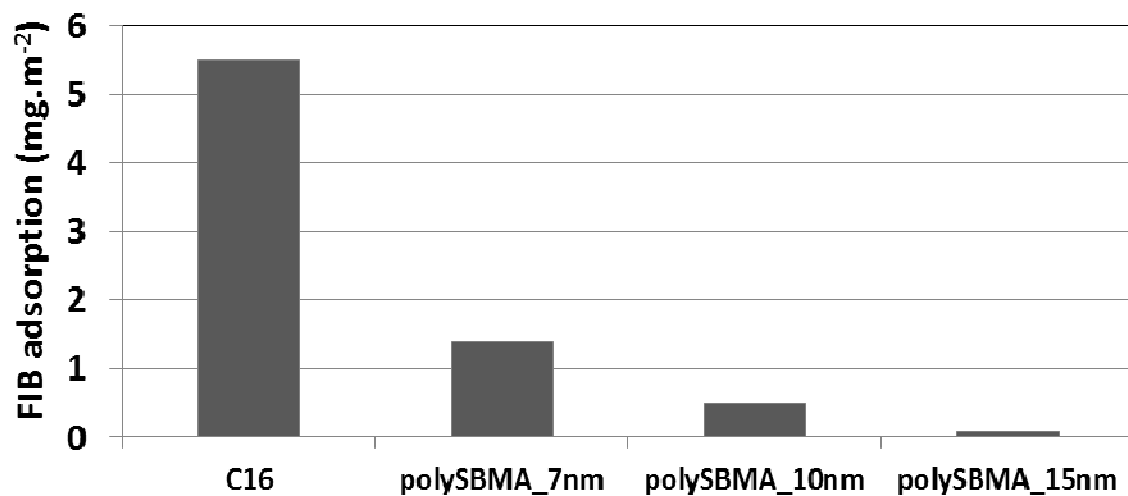

**Figure S3:** FIB adsorption on modified surfaces  
FIB concentration in PBS was 0.1 g.L<sup>-1</sup>.

4. Narrow-scan XPS spectrum of Br<sub>3d</sub> region of NH<sub>2</sub>-polySBMA surface showing disappearance of Br<sub>3d</sub> signal at 70 eV.

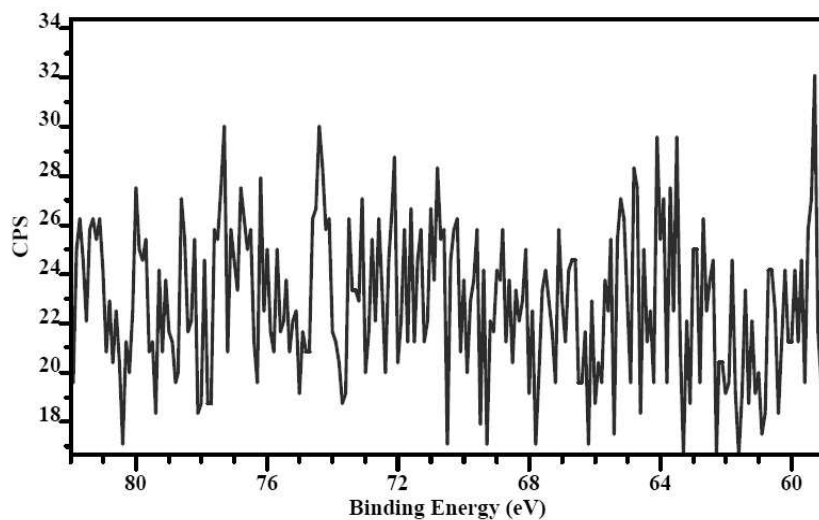

**Figure S4.** Narrow-scan XPS spectrum of Br<sub>3d</sub> region of NH<sub>2</sub>-polySBMA surface

5. Top-view and cross-section AFM images of the polySBMA films after reaction with trifunctional tris(2-aminoethyl)amine linkers and bifunctional suberic acid bis(*N*-hydroxysuccinimide ester), respectively.

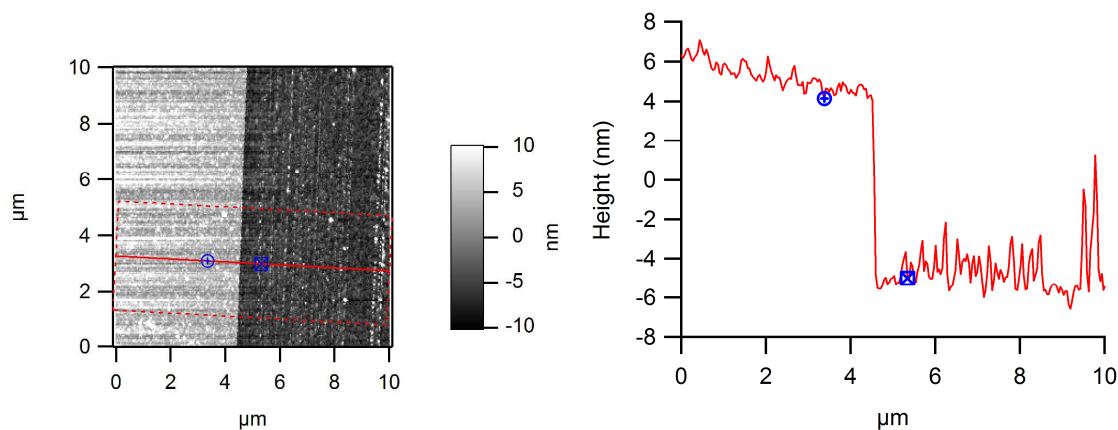

**Figure S5.** Top-view (left) and cross-section (right) AFM images of polySBMA

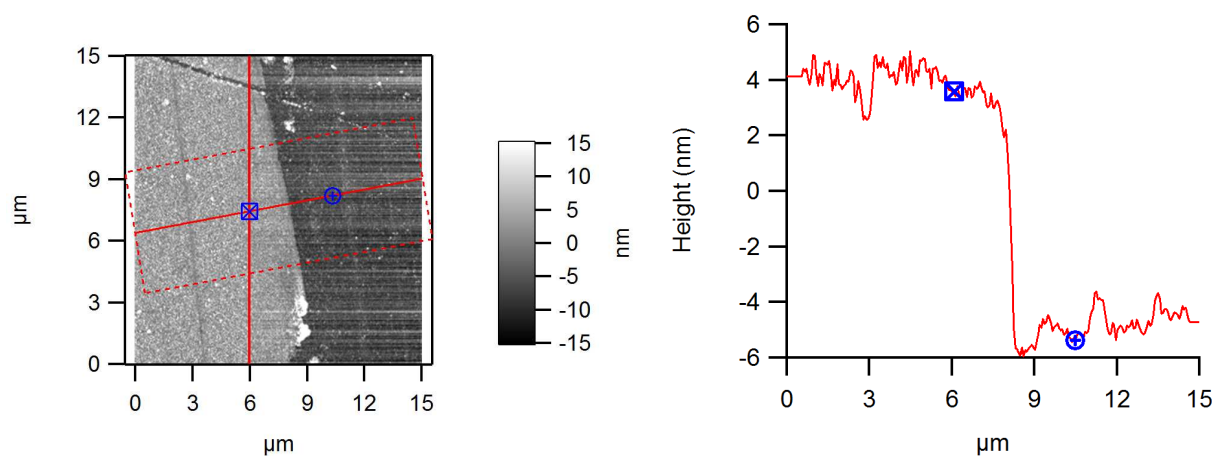

**Figure S6.** Top-view (left) and cross-section (right) AFM images of NH<sub>2</sub>-polySBMA

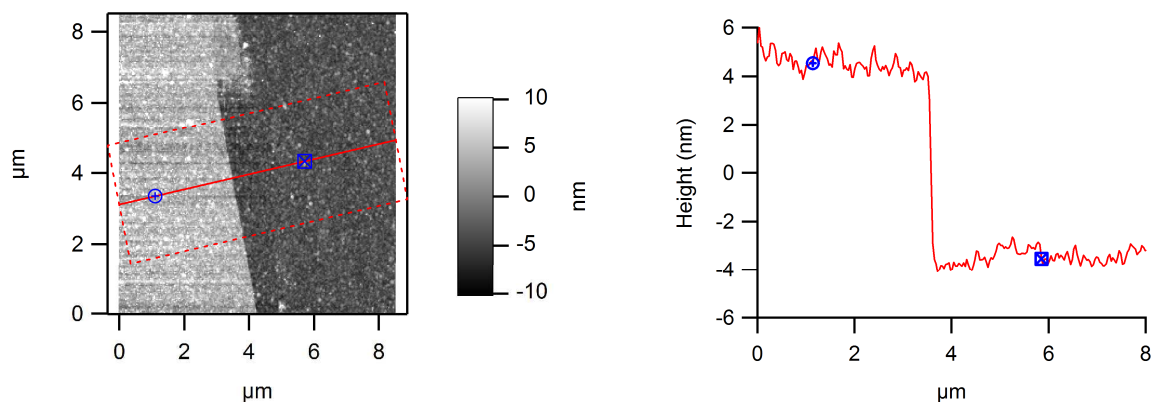

**Figure S7.** Top-view (left) and cross-section (right) AFM images of NHS-polySBMA

6. Top-view and cross-section AFM images of the NHS-polySBMA surface (before antibody attachment) and antibody-coated polySBMA (after antibody attachment)

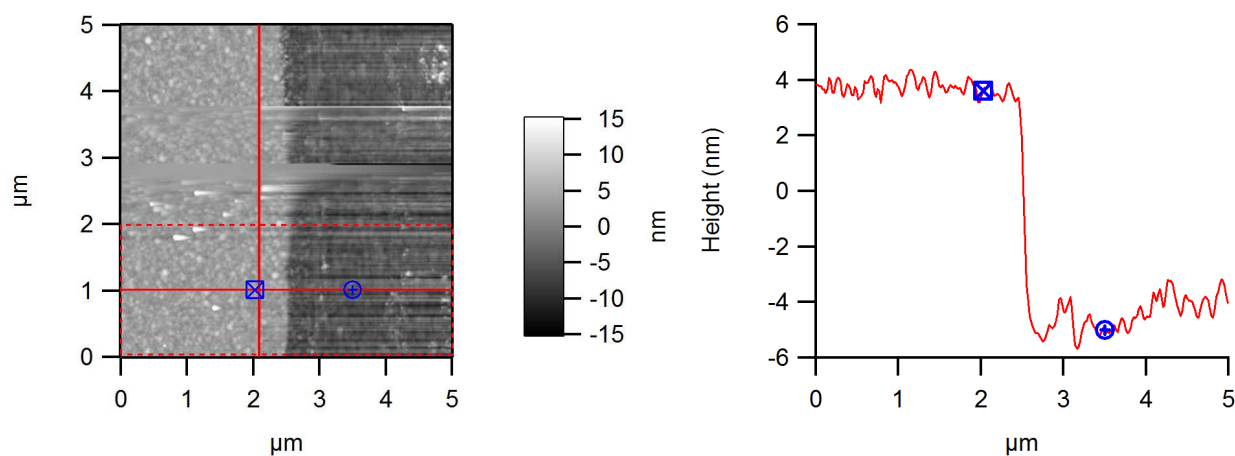

**Figure S8.** Top-view (left) and cross-section (right) AFM images of NHS-polySBMA

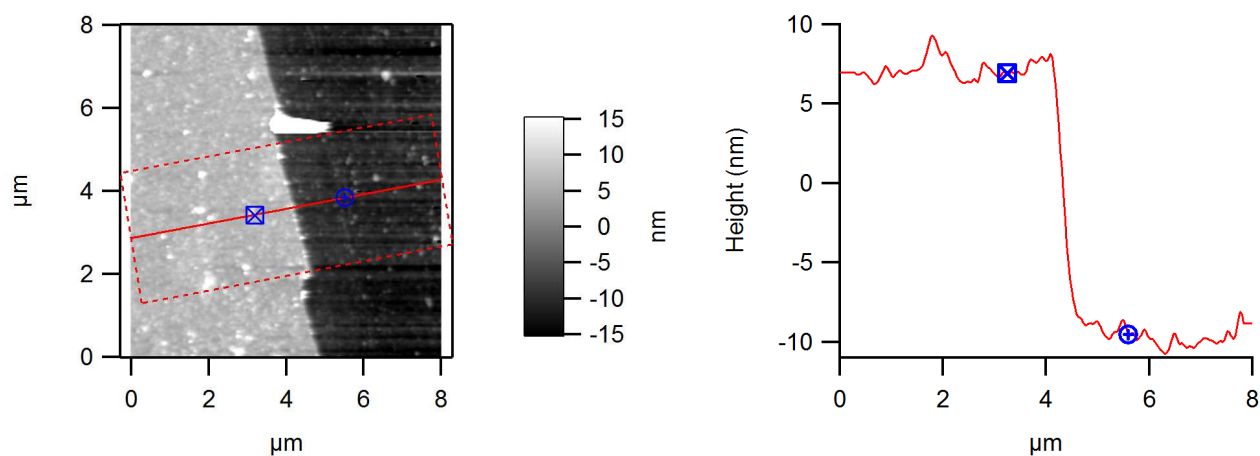

**Figure S9.** Top-view (left) and cross-section (right) AFM images of antibody-polySBMA

7. Narrow-scan XPS spectrum of  $\text{C}_{1s}$  region of antibody-polySBMA surface

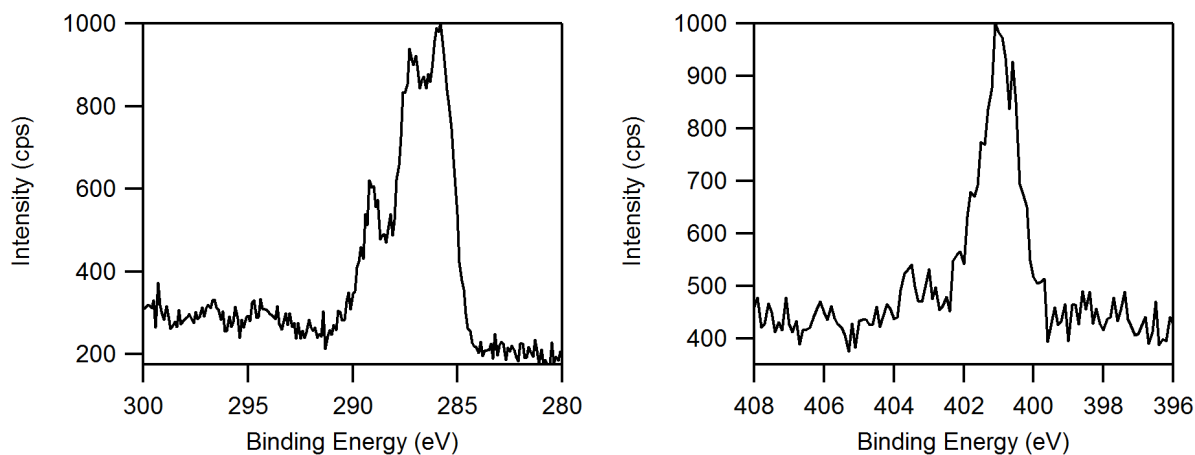

**Figure S10.** Narrow-scan XPS spectrum of  $\text{C}_{1s}$  region (left) and  $\text{N}_{1s}$  region (right) of antibody-polySBMA surface

**REFERENCE:**

1. Nguyen, A. T.; Baggerman, J.; Paulusse, J. M. J.; van Rijn, C. J. M.; Zuilhof, H., *Langmuir* 2011, 27, (6), 2587-2594.
